# Supplementary material for: New liquid absorbents for the removal of CO2 from gas mixtures
Source: Royal Society of Chemistry journal article supplement (doi:10.1039/b901307e), 2009-01-01
Supplement: b901307e.pdf [file b901307e.pdf]

Supplementary Scheme 1 Graphical scheme of the methods of synthesis of the novel amino acids

a)

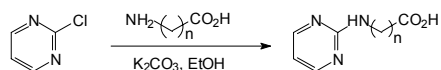

b)

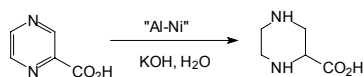

c)

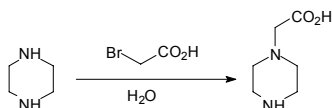

d)

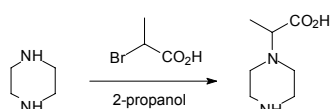

e)

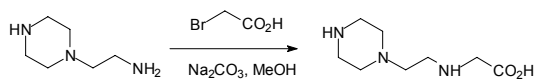

f)

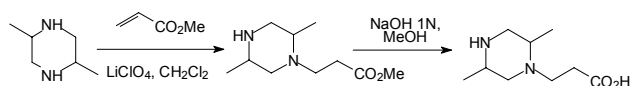

Supplementary Figure 1 Absorption equilibrium set-up sketch

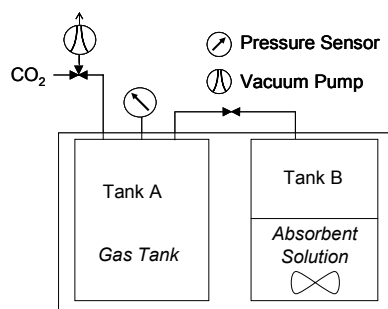

**Supplementary Figure 2**  $^{13}\text{C}$ -NMR spectrum (75MHz) of LA-arginine (a) and  $^{13}\text{C}$ -NMR spectrum (75MHz) of  $\text{CO}_2$ -treated LA-arginine (b) and KOH (1eq), in  $\text{D}_2\text{O}$  at  $20^\circ\text{C}$ .

a)

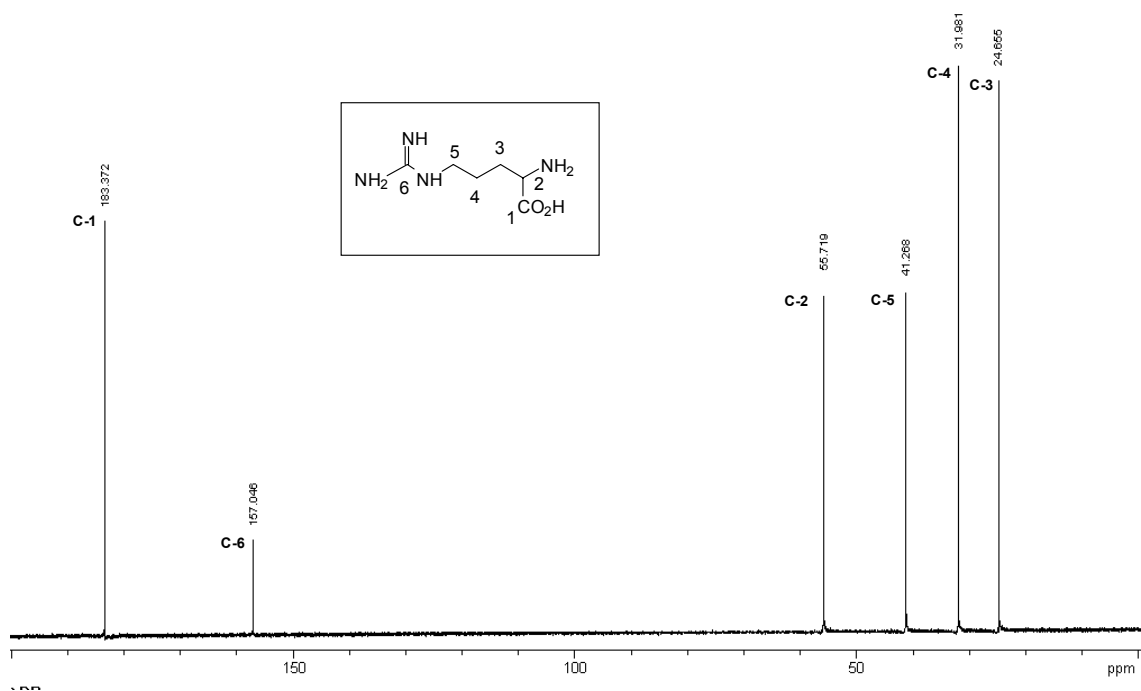

b)

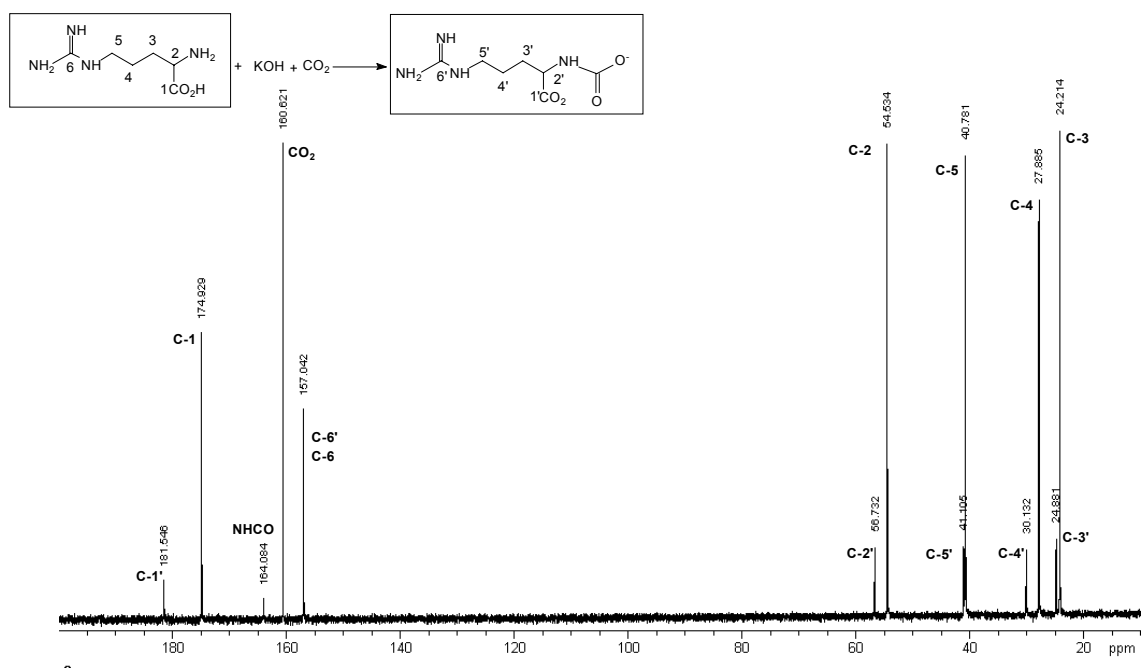

**Supplementary Table 1** DFT Electronic energy values (Kcal/mol) of complexes determined by B3LYP/6-31G\* with BSSE correction

|                              | $\Delta E_{\text{elc}}$ -amino acid | $\Delta E_{\text{elc}}$ -amino acid anion |
|------------------------------|-------------------------------------|-------------------------------------------|
| Glycine                      | -3.85                               | -8.15                                     |
| Proline                      | -4.23                               | -9.46                                     |
| BAPA                         | -3.94                               | -6.20                                     |
| GABA                         | -4.68                               | -5.50                                     |
| Taurine                      | -2.46                               | -4.02                                     |
| Serine                       | -2.79 NH <sub>2</sub>               | -2.30 NH <sub>2</sub>                     |
|                              | -2.53 OH                            | -4.78 OH                                  |
| Threonine                    | -2.58 NH <sub>2</sub>               | -2.46 NH <sub>2</sub>                     |
|                              | -2.20 OH                            | -4.17 OH                                  |
| Ornithine                    | -3.17 NH <sub>2</sub> (1)           | -0.07 NH <sub>2</sub> (1)                 |
|                              | -4.00 NH <sub>2</sub> (2)           | -10.95 NH <sub>2</sub> (2)                |
| Histidine                    | -0.26 NH <sub>2</sub> (1)           | -1.88 NH <sub>2</sub> (1)                 |
|                              | -2.71 NH (2)                        | -5.65 NH (2)                              |
| Arginine                     | -3.93 NH <sub>2</sub> (1)           | -12.69 NH <sub>2</sub> (1)                |
|                              | -1.87 NH (2)                        |                                           |
|                              | -4.72 NH (3)                        |                                           |
|                              | -3.32 NH <sub>2</sub> (4)           |                                           |
| MEA                          | -3.74 NH <sub>2</sub>               |                                           |
|                              | -3.93 OH                            |                                           |
| NH <sub>3</sub> <sup>+</sup> | -3.05                               |                                           |
